# Supplementary material
Source: MDPI journal article supplement (https://www.mdpi.com/2311-7524/8/10/978)
Supplement: s1 [file s1]

**Supplementary Table S2.** liquid chromatography electrospray ionisation tandem mass spectrometry (LC-ESI-MS/MS) analysis of Andrographis paniculate leaf.

|    | Molecular mass<br>(calculated) | Mass spectrum<br>(m/z) fragment ion<br>(positive mode) | Retention<br>time (min) | Formular                                                        | Identified compounds                                                     | KS   | UT   | CR | CM   | RB   |
|----|--------------------------------|--------------------------------------------------------|-------------------------|-----------------------------------------------------------------|--------------------------------------------------------------------------|------|------|----|------|------|
| 1  | 522.5016                       | 540.5355                                               | 35.408                  | C <sub>34</sub> H <sub>66</sub> O <sub>3</sub>                  | Tetrahydro-6-(2-hydroxy-16,19-dimethylhexacosyl)-4-methyl-2H-pyran-2-one | 0.28 | 0    | 0  | 0    | 0    |
| 2  | 475.6175                       | 452                                                    | 33.42                   | C <sub>27</sub> H <sub>41</sub> NO <sub>6</sub>                 | Hydrocortamate                                                           | 0    | 0.04 | 0  | 0    | 0    |
| 3  | 281.272                        | 282.28                                                 | 34.377                  | C <sub>18</sub> H <sub>35</sub> N O                             | Dodemorph                                                                | 0    | 0    | 0  | 4.78 | 0    |
| 4  | 384.3237                       | 402.3575                                               | 26.067                  | C <sub>23</sub> H <sub>44</sub> O <sub>4</sub>                  | MG(0:0/20:1(11Z)/0:0)                                                    | 0    | 0.04 | 0  | 0    | 0    |
| 5  | 604.9                          | 137.4376                                               | 21.87                   | C <sub>38</sub> H <sub>68</sub> O <sub>5</sub>                  | DG(15:0/20:3(5Z,8Z,11Z)/0:0)                                             | 0.01 | 0    | 0  | 0    | 0    |
| 6  | 255.2568                       | 256.2641                                               | 33.587                  | C <sub>16</sub> H <sub>33</sub> N O                             | Palmitic amide                                                           | 0    | 0    | 0  | 1.23 | 0    |
| 7  | 429.43                         | 319.43                                                 | 20.08                   | C <sub>37</sub> H <sub>64</sub> O <sub>4</sub>                  | Dieporeticenin                                                           | 0    | 0    | 0  | 0.05 | 0    |
| 8  | 572.9                          | 407.22                                                 | 23.557                  | C <sub>18</sub> H <sub>34</sub> N <sub>2</sub> O <sub>6</sub> S | Lincomycin                                                               | 0    | 0.05 | 0  | 0    | 0    |
| 9  | 661.9                          | 453.54                                                 | 34.5                    | C <sub>36</sub> H <sub>63</sub> N <sub>5</sub> O <sub>6</sub>   | Cer(d18:0/12:0)                                                          | 0    | 0    | 0  | 0    | 0.02 |
| 10 | 484.2829                       | 507.272                                                | 32.009                  | C <sub>29</sub> H <sub>40</sub> O <sub>6</sub>                  | Stigmatellin Y                                                           | 0    | 0    | 0  | 0.04 | 0    |
| 11 | 512.3142                       | 530.3479                                               | 31.976                  | C <sub>31</sub> H <sub>44</sub> O <sub>6</sub>                  | Carindone                                                                | 0    | 0    | 0  | 0.02 | 0    |
| 12 | 459.2628                       | 460.2701                                               | 21.176                  | C <sub>26</sub> H <sub>37</sub> N O <sub>6</sub>                | Militarinone A                                                           | 0    | 0.02 | 0  | 0    | 0    |
| 13 | 370.7                          | 453.75                                                 | 31.8                    | C <sub>27</sub> H <sub>46</sub>                                 | Cholest-5-ene                                                            | 0    | 0    | 0  | 0.05 | 0    |
| 14 | 301.298                        | 302.3053                                               | 22.409                  | C <sub>18</sub> H <sub>39</sub> N O <sub>2</sub>                | Sphinganine                                                              | 0    | 0.17 | 0  | 0    | 0    |
| 15 | 306.1841                       | 324.2178                                               | 26.577                  | C <sub>19</sub> H <sub>22</sub> N <sub>4</sub>                  | Corrinoid                                                                | 0.03 | 0    | 0  | 0    | 0    |
| 16 | 268.2767                       | 286.3105                                               | 22.386                  | C <sub>18</sub> H <sub>36</sub> O                               | Oleyl alcohol                                                            | 0    | 0.15 | 0  | 0    | 0    |
| 17 | 225.28                         | 245.48                                                 | 22.32                   | C <sub>15</sub> H <sub>15</sub> NO                              | Navenone A                                                               | 0    | 0.07 | 0  | 0    | 0    |
| 18 | 407.4                          | 359.54                                                 | 18.52                   | C <sub>19</sub> H <sub>21</sub> NO <sub>7</sub> S               | Erysothiopine                                                            | 0    | 0.02 | 0  | 0    | 0    |
| 19 | 305.2355                       | 306.2428                                               | 25.47                   | C <sub>19</sub> H <sub>31</sub> N O <sub>2</sub>                | Samandarine                                                              | 0    | 0    | 0  | 0.05 | 0    |
| 20 | 386.1725                       | 409.1617                                               | 21.692                  | C <sub>22</sub> H <sub>26</sub> O <sub>6</sub>                  | Porson                                                                   | 0    | 0.17 | 0  | 0    | 0    |
| 21 | 196.219                        | 214.2528                                               | 21.319                  | C <sub>14</sub> H <sub>28</sub>                                 | Cyclotetradecane                                                         | 0    | 0.49 | 0  | 0    | 0    |

|    |          |          |        |                                                               |                                               |      |      |      |      |       |
|----|----------|----------|--------|---------------------------------------------------------------|-----------------------------------------------|------|------|------|------|-------|
| 22 | 312.5304 | 484.1341 | 12.98  | C <sub>20</sub> H <sub>40</sub> O <sub>2</sub>                | 3L,7D,11D-phytanic acid                       | 0    | 0    | 0    | 0    | 0.04  |
| 23 | 469.3036 | 492.2931 | 23.351 | C <sub>25</sub> H <sub>43</sub> N O <sub>7</sub>              | Methymycin                                    | 0    | 0    | 0    | 0.11 | 0     |
| 24 | 542.03   | 162.1253 | 21.356 | C <sub>21</sub> H <sub>42</sub> O <sub>4</sub>                | Polyoxyethylene 40 monostearate               | 0    | 0    | 0    | 0    | 0.03  |
| 25 | 474.59   | 221.1778 | 24.925 | C <sub>27</sub> H <sub>38</sub> O <sub>7</sub>                | Lucidenic acid L                              | 0.06 | 0    | 0    | 0    | 0     |
| 26 | 226.2299 | 244.2637 | 20.725 | C <sub>15</sub> H <sub>30</sub> O                             | 2-Pentadecanone                               | 0.24 | 0.07 | 0.5  | 0.5  | 0.66  |
| 27 | 316.2627 | 334.2965 | 17.98  | C <sub>18</sub> H <sub>36</sub> O <sub>4</sub>                | MG(0:0/15:0/0:0)                              | 0    | 0.11 | 0    | 0    | 0     |
| 28 | 284.235  | 302.2687 | 20.977 | C <sub>17</sub> H <sub>32</sub> O <sub>3</sub>                | Muricatacin                                   | 0    | 0    | 0    | 0.08 | 0     |
| 29 | 283.41   | 170.0134 | 20.835 | C <sub>16</sub> H <sub>29</sub> NO <sub>3</sub>               | (+/-)-N,N-Dimethyl menthyl succinamide        | 0    | 0    | 0    | 0    | 0.12  |
| 30 | 317.2935 | 318.30   | 20.293 | C <sub>18</sub> H <sub>39</sub> N O <sub>3</sub>              | Phytosphingosine                              | 0    | 0    | 0    | 5.98 | 0     |
| 31 | 273.2668 | 274.27   | 20.122 | C <sub>16</sub> H <sub>35</sub> N O <sub>2</sub>              | C16 Sphinganine                               | 0    | 0    | 0    | 0    | 15.68 |
| 32 | 298.1937 | 299.2009 | 19.805 | C <sub>20</sub> H <sub>26</sub> O <sub>2</sub>                | Juvocimene 2                                  | 0    | 0    | 0    | 0    | 0.06  |
| 33 | 488.6    | 405.3456 | 26.427 | C <sub>24</sub> H <sub>40</sub> O <sub>8</sub> S              | 7-Sulfocholic acid                            | 0    | 0    | 0    | 0    | 0.04  |
| 34 | 286.1938 | 287.2011 | 19.804 | C <sub>19</sub> H <sub>26</sub> O <sub>2</sub>                | Citronellyl cinnamate                         | 0    | 0    | 0    | 0    | 0.07  |
| 35 | 258.1624 | 259.1697 | 19.805 | C <sub>17</sub> H <sub>22</sub> O <sub>2</sub>                | Cicutoxin                                     | 0    | 0    | 0    | 0    | 0.08  |
| 36 | 372.6    | 273.2669 | 19.687 | C <sub>21</sub> H <sub>28</sub> N <sub>2</sub> S <sub>2</sub> | Buthiobate                                    | 0    | 0    | 0    | 0    | 0.03  |
| 37 | 309.3042 | 310.3115 | 34.904 | C <sub>20</sub> H <sub>39</sub> N O                           | N-Hexadecanoylpyrrolidine                     | 0    | 0    | 0.53 | 0    | 0     |
| 38 | 368.2915 | 369.2986 | 33.187 | C <sub>22</sub> H <sub>40</sub> O <sub>4</sub>                | Octadecyl fumarate                            | 0    | 0    | 0.03 | 0    | 0     |
| 39 |          | 212.21   | 30.112 |                                                               | Xylostasin                                    | 0    | 0.09 | 0.08 | 3.48 | 0     |
| 40 | 537.9    | 225.1148 | 19.329 | C <sub>34</sub> H <sub>67</sub> NO <sub>3</sub>               | N-Palmitoylsphingosine                        | 0    | 0    | 0.04 | 0    | 0     |
| 41 | 387.25   | 282.28   | 31.986 | C <sub>18</sub> H <sub>35</sub> N O                           | Oleamide                                      | 0    | 0    | 5.29 | 0    | 0     |
| 42 | 405.6    | 406.2127 | 26.75  | C <sub>22</sub> H <sub>47</sub> NO <sub>5</sub>               | Aminopentol                                   | 0.16 | 0.06 | 0.13 | 0.13 | 0.36  |
| 43 | 262.2307 | 280.26   | 29.872 | C <sub>18</sub> H <sub>30</sub> O                             | 6,10,14-Trimethyl-5,9,13-pentadecatrien-2-one | 0    | 2.1  | 1.74 | 1.74 | 1.63  |
| 44 | 428.3123 | 429.3197 | 29.215 | C <sub>24</sub> H <sub>44</sub> O <sub>6</sub>                | Sorbitan oleate                               | 0    | 0    | 0.05 | 0    | 0     |
| 45 | 402.2268 | 425.2161 | 28.919 | C <sub>21</sub> H <sub>30</sub> N <sub>4</sub> O <sub>4</sub> | Cinitapride                                   | 0    | 0    | 0.07 | 0    | 0     |
| 46 | 588.6    | 398.2442 | 30.566 | C <sub>31</sub> H <sub>40</sub> O <sub>11</sub>               | Sandoricin                                    | 0    | 0.05 | 0    | 0    | 0     |
| 47 | 576.7    | 281.272  | 32.955 | C <sub>36</sub> H <sub>36</sub> N <sub>2</sub> O <sub>5</sub> | Tiliacorine                                   | 0    | 0    | 0    | 0.04 | 0     |
| 48 | 398.2459 | 421.2353 | 25.982 | C <sub>25</sub> H <sub>34</sub> O <sub>4</sub>                | Pregna-5,16,20-triene-3beta,20-diol diacetate | 0    | 0    | 0.03 | 0    | 0     |
| 49 | 272.42   | 268.2765 | 36.057 | HO(CH <sub>2</sub> ) <sub>15</sub> CO <sub>2</sub> H          | 16-hydroxy hexadecanoic acid                  | 0    | 0.11 | 0    | 0.17 | 0.15  |
| 50 | 398.2445 | 421.2338 | 25.554 | C <sub>18</sub> H <sub>39</sub> O <sub>7</sub> P              | Tris(butoxyethyl)phosphate                    | 0    | 0    | 0.04 | 0    | 0     |

|    |          |           |        |                                                                |                                                                                                          |      |      |      |      |      |
|----|----------|-----------|--------|----------------------------------------------------------------|----------------------------------------------------------------------------------------------------------|------|------|------|------|------|
| 51 | 448.2813 | 449.2887  | 25.503 | C <sub>26</sub> H <sub>40</sub> O <sub>6</sub>                 | (ent-2b,4S,9a)-2,4,9-Trihydroxy-10(14)-oplopen-3-one 2-(2-methylbutanoate) 9-(3-methyl-2E-pentenoate)    | 0    | 0    | 0.02 | 0    | 0    |
| 52 | 428.5    | 226.23    | 25.301 | C <sub>24</sub> H <sub>28</sub> O <sub>7</sub>                 | 1-Isomangostin hydrate                                                                                   | 0    | 0.04 | 0    | 0    | 0    |
| 53 | 294.53   | 414.2041  | 9.27   | C <sub>8</sub> H <sub>16</sub> N <sub>2</sub> O <sub>3</sub> S | Alanyl-Methionine                                                                                        | 0    | 0.04 | 0    | 0    | 0    |
| 54 | 783.27   | 384.324   | 13.997 | C <sub>16</sub> H <sub>28</sub> O <sub>13</sub>                | b-D-Xylopyranosyl-(1->4)-a-L-rhamnopyranosyl-(1->2)-D-fucose                                             | 0.01 | 0    | 0    | 0    | 0    |
| 55 | 428.39   | 275.1484  | 4.421  | C <sub>24</sub> H <sub>42</sub> O <sub>7</sub> P <sub>2</sub>  | SR 12813                                                                                                 | 0    | 0    | 0    | 0    | 0.09 |
| 56 | 270.4    | 356.2331  | 15.734 | C <sub>18</sub> H <sub>22</sub> O <sub>2</sub>                 | 3-Hydroxyestra-1,3,5(10)-trien-16-one                                                                    | 0.02 | 0.13 | 0    | 0    | 0.04 |
| 57 | 332.4    | 278.1518  | 9.276  | C <sub>20</sub> H <sub>28</sub> O <sub>4</sub>                 | 13-Hydroxy-2-(hydroxymethylene)-3-oxo-13,17-seco-5alpha-androstan-17-oic acid, delta-lactone             | 0    | 0    | 0    | 0    | 0.16 |
| 58 | 332.4    | 640.325   | 15.734 | C <sub>14</sub> H <sub>23</sub> NO                             | N-Isobutyl-2,4,8-decatrienamide                                                                          | 0    | 0    | 0    | 0    | 0.05 |
| 59 | 1103.2   | 296.1776  | 16.659 | C <sub>54</sub> H <sub>86</sub> O <sub>23</sub>                | Protoprimulagenin A 3-[rhamnosyl-(1->4)-rhamnosyl-(1->4)-[rhamnosyl-(1->2)]-glucosyl-(1->?)-glucuronide] | 0    | 0    | 0    | 0.02 | 0    |
| 60 | 502.2583 | 503.2657  | 15.767 | C <sub>28</sub> H <sub>38</sub> O <sub>8</sub>                 | Cavipetin B                                                                                              | 0.17 | 0    | 0    | 0    | 0    |
| 61 | 414.2058 | 432.2397  | 19.079 | C <sub>24</sub> H <sub>30</sub> O <sub>6</sub>                 | Armillaripin                                                                                             | 0.22 | 1.04 | 0.23 | 0    | 0.22 |
| 62 | 182.204  | 200.2379  | 18.505 | C <sub>13</sub> H <sub>26</sub>                                | 1-Tridecene                                                                                              | 0.08 | 0.09 | 0.14 | 0.14 | 0.21 |
| 63 | 182.0706 | 205.06    | 12.665 | C <sub>6</sub> H <sub>15</sub> O <sub>4</sub> P                | Triethyl phosphate                                                                                       | 0    | 0    | 0    | 0    | 5.18 |
| 64 | 154.0393 | 155.0468  | 12.688 | C <sub>4</sub> H <sub>11</sub> O <sub>4</sub> P                | Diethylphosphate                                                                                         | 0    | 0    | 0    | 0    | 0.13 |
| 65 | 300.4351 | 300.20893 | 18.092 | C <sub>20</sub> H <sub>28</sub> O <sub>2</sub>                 | 17alpha-Methyl-17beta-hydroxyandrosta-4,6-dien-3-one                                                     | 0.03 | 0    | 0    | 0    | 0    |
| 66 | 318.4    | 405.3456  | 19.813 | C <sub>20</sub> H <sub>30</sub> O <sub>3</sub>                 | 4,5alpha-Dihydro-2-(hydroxymethylene)testosterone                                                        | 0.21 | 0.04 | 0.17 | 0.17 | 0.1  |
| 67 | 463.32   | 453.3091  | 20.801 |                                                                | I-123 BMIPP                                                                                              | 0.04 | 0    | 0    | 0    | 0    |
| 68 | 334.2153 | 357.2046  | 17.268 | C <sub>20</sub> H <sub>30</sub> O <sub>4</sub>                 | 6Î²,7Î²-Dihydroxykaurenoic acid                                                                          | 0.15 | 0.12 | 0.21 | 0.25 | 0.16 |
| 69 | 446.0868 | 447.0941  | 11.411 | C <sub>21</sub> H <sub>18</sub> O <sub>11</sub>                | Glucorhein                                                                                               | 0    | 0    | 0    | 0.04 | 0    |
| 70 | 564.2283 | 565.2353  | 15.784 | C <sub>22</sub> H <sub>36</sub> N <sub>4</sub> O <sub>13</sub> | Aerobactin                                                                                               | 0    | 0    | 0.07 | 0    | 0    |
| 71 | 316.2047 | 317.212   | 17.209 | C <sub>20</sub> H <sub>28</sub> O <sub>3</sub>                 | 17beta-Hydroxy-17-methylandrosta-4-ene-3,11-dione                                                        | 0.12 | 0.36 | 0.18 | 0.31 | 0.14 |
| 72 |          | 414.2041  | 21.356 | C <sub>20</sub> H <sub>30</sub> O <sub>5</sub>                 | 15-dehydro-prostaglandin I2                                                                              | 0.02 | 0.04 | 0.34 | 0.34 | 0.24 |

|    |          |          |        |                                                                              |                                                 |      |      |      |      |      |
|----|----------|----------|--------|------------------------------------------------------------------------------|-------------------------------------------------|------|------|------|------|------|
| 73 | 446.4    | 316.204  | 14.544 | C <sub>18</sub> H <sub>22</sub> O <sub>11</sub> S                            | Paederoside                                     | 0    | 0.19 | 0    | 0    | 0    |
| 74 | 170.0142 | 188.0481 | 14.012 | C <sub>8</sub> H <sub>7</sub> Cl O <sub>2</sub>                              | 4-Chlorophenylacetic acid                       | 0.06 | 0.11 | 0.13 | 0.13 | 0.17 |
| 75 | 518.5    | 386.1729 | 19.351 | C <sub>20</sub> H <sub>30</sub> N <sub>4</sub> O <sub>12</sub>               | Poly-g-D-glutamate                              | 0    | 0.08 | 0    | 0    | 0    |
| 76 | 448.12   | 373.1996 | 13.128 | C <sub>20</sub> H <sub>30</sub> O <sub>5</sub>                               | Oryzalic acid B                                 | 0    | 0    | 0.03 | 0    | 0    |
| 77 | 496.2772 | 519.2662 | 13.572 | C <sub>21</sub> H <sub>36</sub> N <sub>8</sub> O <sub>6</sub>                | APGPR Enterostatin                              | 0    | 0    | 0.15 | 0    | 0    |
| 78 | 241.1468 | 242.1541 | 12.812 | C <sub>16</sub> H <sub>19</sub> N O                                          | Dehydroisochalciporone                          | 0    | 0    | 0    | 0    | 0.19 |
| 79 | 296.4    | 262.23   | 30.69  | C <sub>20</sub> H <sub>24</sub> O <sub>2</sub>                               | 5-Methoxy-1,7-diphenyl-3-heptanone              | 0    | 0.03 | 0    | 0    | 0    |
| 80 | 404.183  | 405.1903 | 13.622 | C <sub>22</sub> H <sub>28</sub> O <sub>7</sub>                               | Eupaserrin                                      | 0    | 0.06 | 0    | 0    | 0    |
| 81 | 162.126  | 185.1152 | 11.827 | C <sub>8</sub> H <sub>18</sub> O <sub>3</sub>                                | (3R,7R)-1,3,7-Octanetriol                       | 0.17 | 0.12 | 0.17 | 0.21 | 0.23 |
| 82 | 608.7    | 483.4652 | 18.884 | C <sub>36</sub> H <sub>36</sub> N <sub>2</sub> O <sub>7</sub>                | Somniferine                                     | 0    | 0.07 | 0    | 0    | 0    |
| 83 | 757.4675 | 780.4572 | 10.719 | C <sub>43</sub> H <sub>68</sub> N O <sub>8</sub> P                           | PE(18:4(6Z,9Z,12Z,15Z)/20:5(5Z,8Z,11Z,14Z,17Z)) | 0    | 0    | 0.01 | 0    | 0    |
| 84 | 514.3084 | 537.2978 | 9.261  | C <sub>34</sub> H <sub>42</sub> O <sub>4</sub>                               | Flavidulol C                                    | 0    | 0    | 0.03 | 0    | 0    |
| 85 | 399.4    | 555.523  | 16.893 | C <sub>21</sub> H <sub>19</sub> F <sub>2</sub> N <sub>3</sub> O <sub>3</sub> | Difloxacin                                      | 0.01 | 0    | 0    | 0    | 0    |
| 86 | 293.1487 | 294.1559 | 3.745  | C <sub>12</sub> H <sub>23</sub> N O <sub>7</sub>                             | N-(1-Deoxy-1-fructosyl)leucine                  | 0    | 0    | 0.03 | 0    | 0    |
| 87 | 197.1205 | 198.1278 | 12.726 | C <sub>14</sub> H <sub>15</sub> N                                            | 2-(3-Phenylpropyl)pyridine                      | 0.25 | 0.11 | 0.43 | 0.62 | 0.6  |
| 88 | 386.1203 | 387.1277 | 3.739  | C <sub>17</sub> H <sub>22</sub> O <sub>10</sub>                              | 1-O-Sinapoylglucose                             | 0    | 0    | 0.01 | 0    | 0    |
| 89 | 431.5    | 318.2194 | 6.55   | C <sub>19</sub> H <sub>37</sub> N <sub>5</sub> O <sub>6</sub>                | Istamycin C1                                    | 0    | 0    | 0    | 0.05 | 0    |
| 90 | 330.34   | 278.1518 | 9.27   | C <sub>16</sub> H <sub>18</sub> N <sub>4</sub> O <sub>4</sub>                | Pseudomonine                                    | 0.03 | 0    | 0    | 0    | 0    |
| 91 | 117.0789 | 140.0681 | 4.169  | C <sub>5</sub> H <sub>11</sub> NO <sub>2</sub>                               | Norvaline                                       | 0    | 0    | 0.08 | 0    | 0    |
| 92 | 117.15   | 262.23   | 2.954  | C <sub>5</sub> H <sub>11</sub> NO <sub>2</sub>                               | Isoamyl nitrite                                 | 0    | 0    | 0.45 | 0    | 0    |
| 93 | 590.71   | 350.2095 | 20.02  | C <sub>36</sub> H <sub>38</sub> N <sub>4</sub> O <sub>4</sub>                | Dimethylprotoporphyrin IX dimethyl ester        | 0    | 0.39 | 0    | 0    | 0    |
| 94 | 406.5    | 226.1679 | 4.421  | C <sub>25</sub> H <sub>26</sub> O <sub>5</sub>                               | Kanzonol Z                                      | 0.02 | 0    | 0    | 0    | 0    |
| 95 | 555.5237 | 578.5129 | 32.164 | C <sub>34</sub> H <sub>69</sub> NO <sub>4</sub>                              | Armillaramide                                   | 0.07 | 0.02 | 0.05 | 0.02 | 0.09 |
| 96 | 226.1687 | 249.1579 | 5.306  | C <sub>12</sub> H <sub>22</sub> N <sub>2</sub> O <sub>2</sub>                | 1,8-Diazacyclotetradecane-2,9-dione             | 0.35 | 0    | 0.35 | 0.44 | 0.46 |
| 97 | 354.31   | 305.2353 | 22.371 | C <sub>16</sub> H <sub>18</sub> O <sub>9</sub>                               | Cis-5-Caffeoylquinic acid                       | 0    | 0.04 | 0    | 0    | 0    |
| 98 | 174.11   | 225.1148 | 19.07  | C <sub>6</sub> H <sub>6</sub> O <sub>6</sub>                                 | trans-Aconitate                                 | 0.02 | 0    | 0    | 0    | 0    |
| 99 | 208.21   | 168.1879 | 19.492 | C <sub>8</sub> H <sub>16</sub> O <sub>6</sub>                                | Ethyl beta-D-glucopyranoside                    | 0.06 | 0.19 | 0    | 0    | 0    |

|     |          |          |        |                                                               |                        |      |      |      |      |      |
|-----|----------|----------|--------|---------------------------------------------------------------|------------------------|------|------|------|------|------|
| 100 |          | 278.1517 | 16.241 | C <sub>7</sub> H <sub>8</sub> N <sub>4</sub> O <sub>2</sub>   | Theophylline           | 0.1  | 0    | 0    | 0    | 0    |
| 101 | 278.1529 | 301.1422 | 26.998 | C <sub>16</sub> H <sub>22</sub> O <sub>4</sub>                | Alpha-CEHC             | 0.26 | 0.1  | 0.26 | 0.27 | 0.31 |
| 102 | 382.5    | 86.0734  | 15.734 | C <sub>22</sub> H <sub>38</sub> O <sub>5</sub>                | Misoprostol            | 0    | 0.01 | 0    | 0    | 0    |
| 103 | 342.3    | 166.06   | 13.999 | C <sub>12</sub> H <sub>22</sub> O <sub>11</sub>               | Inulobiose             | 0    | 3.98 | 0    | 0    | 0    |
| 104 | 340.3351 | 358.3689 | 25.127 | C <sub>22</sub> H <sub>44</sub> O <sub>2</sub>                | 6-Hydroxy-8-docosanone | 0.03 | 0.11 | 0.03 | 0.03 | 0.04 |
| 105 | 86.13    | 121.09   | 3.122  | C <sub>5</sub> H <sub>10</sub> O                              | (S)-2-Methylbutanal    | 0    | 0    | 0    | 3.48 | 3.48 |
| 106 | 592.59   | 197.1204 | 13.065 | C <sub>38</sub> H <sub>76</sub> N <sub>2</sub> O <sub>2</sub> | Stearamide             | 0    | 0.26 | 0    | 0    | 0    |
| 107 | 180.16   | 296.1776 | 9.053  | C <sub>7</sub> H <sub>8</sub> N <sub>4</sub> O <sub>2</sub>   | Paraxanthine           | 0    | 0.03 | 0    | 0    | 0    |
| 108 | 152.177  | 182.0707 | 4.364  | C <sub>5</sub> H <sub>4</sub> N <sub>4</sub> S                | 6-Mercaptopurine       | 0.02 | 0    | 0    | 0    | 0    |
| 109 | 453.6    | 270.1616 | 3.321  | C <sub>25</sub> H <sub>43</sub> NO <sub>6</sub>               | 10-Deoxymethymycin     | 0    | 0.02 | 0.08 | 0.08 | 0.08 |
| 110 | 212.37   | 170.0134 | 3.122  | C <sub>14</sub> H <sub>28</sub> O                             | 2-Tetradecanone        | 0    | 0.58 | 0.05 | 0.04 | 0    |
