# Supplementary material
Source: MDPI journal article supplement (https://www.mdpi.com/2311-7524/8/10/978)
Supplement: s1 [file s1]

## HPLC Chromatogram

### 14-Deoxyandrographolide 1,000 ppm

8/4/2565 13:46:38 Page 1 / 1

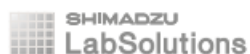

## Analysis Report

### <Sample Information>

Sample Name : 14-Deoxyandrographolide1000ppm  
Sample ID : 14-Deoxyandrographolide1000ppm  
Data Filename : 14-Deoxyandrographolide1000ppm.lcd  
Method Filename : Pinostobin gradient.lcm  
Batch Filename : STD.lcb  
Vial # : 1-8  
Injection Volume : 10 uL  
Date Acquired : 8/4/2565 3:22:41  
Date Processed : 8/4/2565 3:47:43  
Sample Type : Unknown  
Acquired by : System Administrator  
Processed by : System Administrator

### <Chromatogram>

mAU

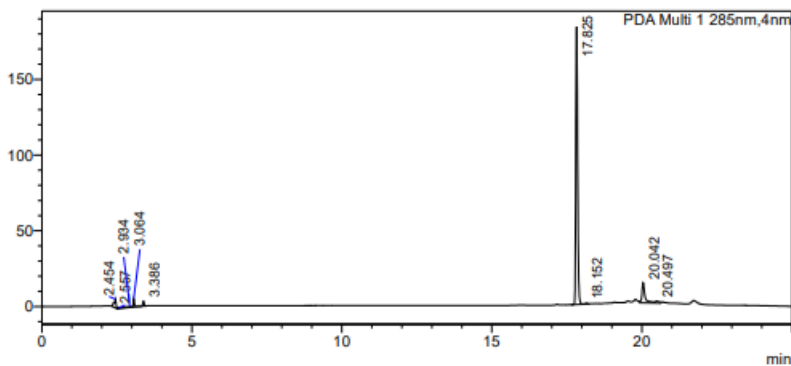

### <Peak Table>

| PDA Ch1 285nm |           |        |        |       |      |      |      |
|---------------|-----------|--------|--------|-------|------|------|------|
| Peak#         | Ret. Time | Area   | Height | Conc. | Unit | Mark | Name |
| 1             | 2.454     | 25595  | 5675   | 0.000 |      |      |      |
| 2             | 2.557     | 2363   | 521    | 0.000 |      |      |      |
| 3             | 2.934     | 13792  | 627    | 0.000 |      | V    |      |
| 4             | 3.064     | 15471  | 5368   | 0.000 |      | V    |      |
| 5             | 3.386     | 9916   | 3335   | 0.000 |      | V    |      |
| 6             | 17.825    | 748669 | 183436 | 0.000 |      |      |      |
| 7             | 18.152    | 5433   | 781    | 0.000 |      | V    |      |
| 8             | 20.042    | 92873  | 13258  | 0.000 |      |      |      |
| 9             | 20.497    | 13535  | 1348   | 0.000 |      | V    |      |
| Total         |           | 927647 | 214350 |       |      |      |      |

## HPLC Chromatogram

### 14-Deoxyandrographolide 750 ppm

8/4/2565 13:46:38 Page 1 / 1

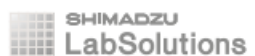

## Analysis Report

### <Sample Information>

Sample Name : 14-Deoxyandrographolide1000ppm  
Sample ID : 14-Deoxyandrographolide1000ppm  
Data Filename : 14-Deoxyandrographolide1000ppm.lcd  
Method Filename : Pinostobin gradient.lcm  
Batch Filename : STD.lcb  
Vial # : 1-8  
Injection Volume : 10 uL  
Date Acquired : 8/4/2565 3:22:41  
Date Processed : 8/4/2565 3:47:43  
Sample Type : Unknown  
Acquired by : System Administrator  
Processed by : System Administrator

### <Chromatogram>

mAU

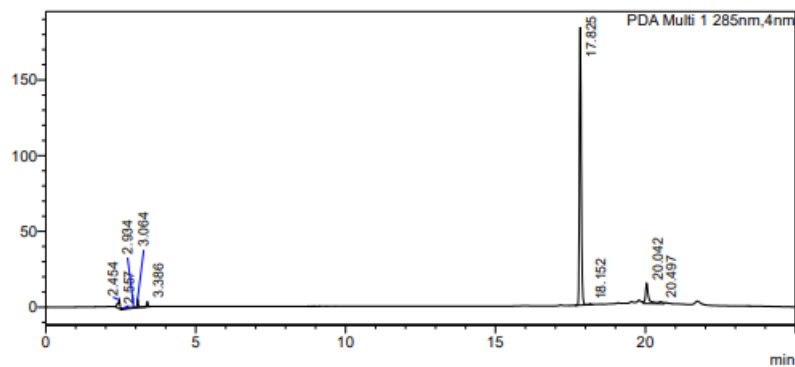

### <Peak Table>

| PDA Ch1 285nm |           |        |        |       |      |      |      |
|---------------|-----------|--------|--------|-------|------|------|------|
| Peak#         | Ret. Time | Area   | Height | Conc. | Unit | Mark | Name |
| 1             | 2.454     | 25595  | 5675   | 0.000 |      |      |      |
| 2             | 2.557     | 2363   | 521    | 0.000 |      |      |      |
| 3             | 2.934     | 13792  | 627    | 0.000 |      | V    |      |
| 4             | 3.064     | 15471  | 5368   | 0.000 |      | V    |      |
| 5             | 3.386     | 9916   | 3335   | 0.000 |      | V    |      |
| 6             | 17.825    | 748669 | 183436 | 0.000 |      |      |      |
| 7             | 18.152    | 5433   | 781    | 0.000 |      | V    |      |
| 8             | 20.042    | 92873  | 13258  | 0.000 |      |      |      |
| 9             | 20.497    | 13535  | 1348   | 0.000 |      | V    |      |
| Total         |           | 927647 | 214350 |       |      |      |      |

## HPLC Chromatogram

### 14-Deoxyandrographolide 500 ppm

8/4/2565 13:41:19 Page 1 / 1

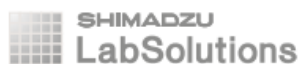

## Analysis Report

### <Sample Information>

Sample Name : 14-deoxy.500 ppm  
Sample ID : 14-deoxy.500 ppm  
Data Filename : 14-deoxy.500 ppm.lcd  
Method Filename : Pinostobin gradient.lcm  
Batch Filename : STD.lcb  
Vial # : 1-1  
Injection Volume : 10 uL  
Date Acquired : 7/4/2565 17:50:11  
Date Processed : 7/4/2565 23:32:56

Sample Type : Unknown  
Acquired by : System Administrator  
Processed by : System Administrator

### <Chromatogram>

mAU

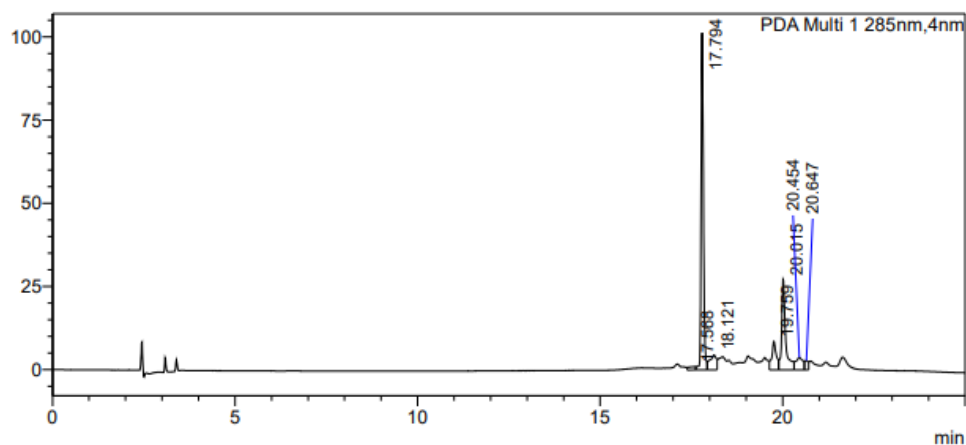

### <Peak Table>

PDA Ch1 285nm

| Peak# | Ret. Time | Area   | Height | Conc. | Unit | Mark | Name |
|-------|-----------|--------|--------|-------|------|------|------|
| 1     | 17.568    | 12967  | 984    | 0.000 |      |      |      |
| 2     | 17.794    | 445188 | 101274 | 0.000 |      | V    |      |
| 3     | 18.121    | 57283  | 4528   | 0.000 |      | V    |      |
| 4     | 19.759    | 74053  | 8555   | 0.000 |      |      |      |
| 5     | 20.015    | 199715 | 27078  | 0.000 |      | V    |      |
| 6     | 20.454    | 51604  | 3748   | 0.000 |      | V    |      |
| 7     | 20.647    | 18493  | 2757   | 0.000 |      | V    |      |
| Total |           | 859303 | 148924 |       |      |      |      |

## HPLC Chromatogram

Andrographolide 1,000 ppm

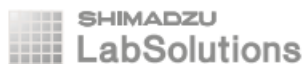

# Analysis Report

### <Sample Information>

Sample Name : andrographolide1000ppm  
Sample ID : andrographolide1000ppm  
Data Filename : andrographolide1000ppm.lcd  
Method Filename : Pinostobin gradient.lcm  
Batch Filename : STD.lcb  
Vial # : 1-7  
Injection Volume : 10 uL  
Date Acquired : 8/4/2565 2:57:11  
Date Processed : 8/4/2565 3:22:12

Sample Type : Unknown  
Acquired by : System Administrator  
Processed by : System Administrator

### <Chromatogram>

mAU

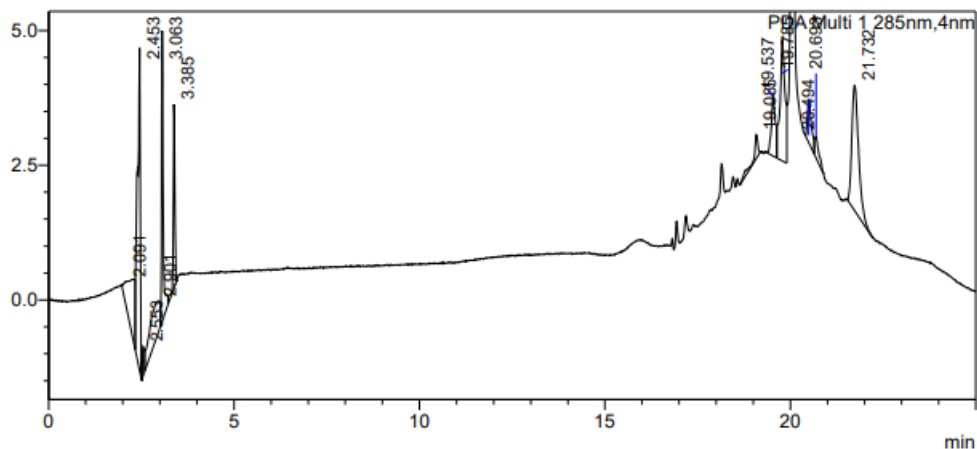

### <Peak Table>

PDA Ch1 285nm

| Peak# | Ret. Time | Area   | Height | Conc. | Unit | Mark | Name |
|-------|-----------|--------|--------|-------|------|------|------|
| 1     | 2.091     | 14597  | 451    | 0.000 |      |      |      |
| 2     | 2.453     | 30852  | 5993   | 0.000 |      | V    |      |
| 3     | 2.553     | 2130   | 532    | 0.000 |      |      |      |
| 4     | 2.901     | 14043  | 674    | 0.000 |      | V    |      |
| 5     | 3.063     | 15468  | 5393   | 0.000 |      | V    |      |
| 6     | 3.385     | 9978   | 3399   | 0.000 |      | V    |      |
| 7     | 19.085    | 3554   | 434    | 0.000 |      |      |      |
| 8     | 19.537    | 8716   | 1144   | 0.000 |      |      |      |
| 9     | 19.785    | 20877  | 2243   | 0.000 |      | V    |      |
| 10    | 20.494    | 6071   | 788    | 0.000 |      |      |      |
| 11    | 20.693    | 3041   | 400    | 0.000 |      | V    |      |
| 12    | 21.732    | 29518  | 2326   | 0.000 |      |      |      |
| Total |           | 158846 | 23779  |       |      |      |      |

## HPLC Chromatogram

### Andrographolide 750 ppm

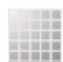

SHIMADZU  
LabSolutions

## Analysis Report

### <Sample Information>

Sample Name : neonadro750ppm  
Sample ID : neonadro750ppm  
Data Filename : neonadro750ppm.lcd  
Method Filename : Pinostobin gradient.lcm  
Batch Filename : STD.lcb  
Vial # : 1-5  
Injection Volume : 10 uL  
Date Acquired : 8/4/2565 2:06:09  
Date Processed : 8/4/2565 2:31:11

Sample Type : Unknown  
Acquired by : System Administrator  
Processed by : System Administrator

### <Chromatogram>

mAU

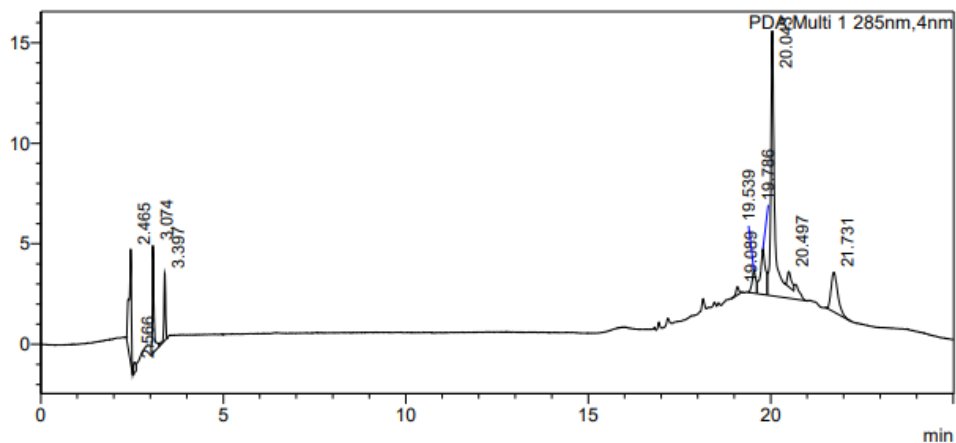

### <Peak Table>

PDA Ch1 285nm

| Peak# | Ret. Time | Area   | Height | Conc. | Unit | Mark | Name |
|-------|-----------|--------|--------|-------|------|------|------|
| 1     | 2.465     | 24425  | 5684   | 0.000 |      |      |      |
| 2     | 2.566     | 2362   | 523    | 0.000 |      |      |      |
| 3     | 3.074     | 15755  | 5359   | 0.000 |      |      |      |
| 4     | 3.397     | 10164  | 3356   | 0.000 |      | V    |      |
| 5     | 19.089    | 2366   | 413    | 0.000 |      |      |      |
| 6     | 19.539    | 8163   | 1153   | 0.000 |      |      |      |
| 7     | 19.786    | 21393  | 2256   | 0.000 |      | V    |      |
| 8     | 20.043    | 108146 | 13186  | 0.000 |      | SV   |      |
| 9     | 20.497    | 5901   | 754    | 0.000 |      | T    |      |
| 10    | 21.731    | 24944  | 1968   | 0.000 |      |      |      |
| Total |           | 223618 | 34652  |       |      |      |      |

## HPLC Chromatogram

Andrographolide 500 ppm

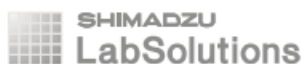

# Analysis Report

### <Sample Information>

Sample Name : 500ppm  
Sample ID : 500ppm  
Data Filename : 500ppm.lcd  
Method Filename : Pinostobin gradient.lcm  
Batch Filename : STD.lcb  
Vial # : 1-4  
Injection Volume : 10 uL  
Date Acquired : 8/4/2565 1:40:37  
Date Processed : 8/4/2565 2:05:39

Sample Type : Unknown  
Acquired by : System Administrator  
Processed by : System Administrator

### <Chromatogram>

mAU

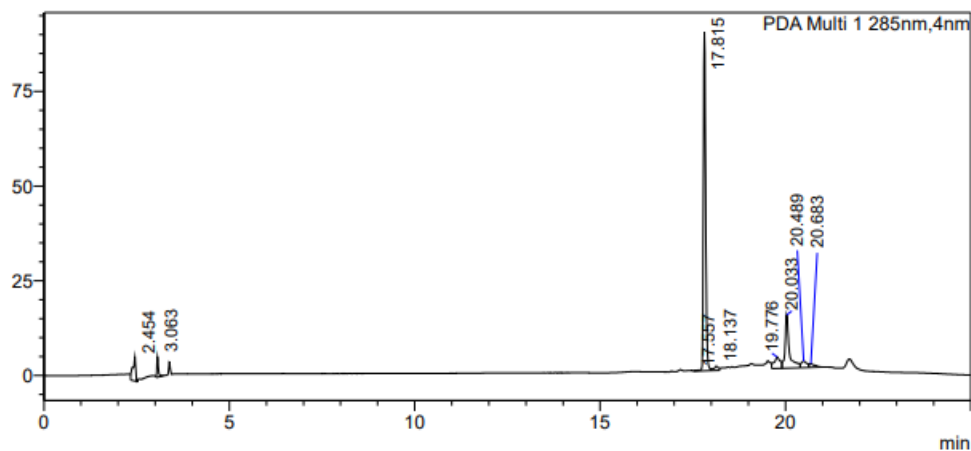

### <Peak Table>

PDA Ch1 285nm

| Peak# | Ret. Time | Area   | Height | Conc. | Unit | Mark | Name |
|-------|-----------|--------|--------|-------|------|------|------|
| 1     | 2.454     | 31976  | 6131   | 0.000 |      |      |      |
| 2     | 3.063     | 15533  | 5377   | 0.000 |      |      |      |
| 3     | 17.557    | 1441   | 234    | 0.000 |      |      |      |
| 4     | 17.815    | 371286 | 89399  | 0.000 |      | V    |      |
| 5     | 18.137    | 10145  | 1156   | 0.000 |      | V    |      |
| 6     | 19.776    | 34897  | 3049   | 0.000 |      |      |      |
| 7     | 20.033    | 110599 | 14071  | 0.000 |      | V    |      |
| 8     | 20.489    | 18372  | 1734   | 0.000 |      | V    |      |
| 9     | 20.683    | 9806   | 947    | 0.000 |      | V    |      |
| Total |           | 604056 | 122098 |       |      |      |      |
