# Supplementary material
Source: MDPI journal article supplement (https://www.mdpi.com/2311-7524/8/10/978)
Supplement: s1 [file s1]

**Supplementary Table S1.** *Andrographis paniculata* (burm.F.) seed information.

| Collecting<br>number | Locations of local<br>produces | Seed<br>characteristics      | Relative<br>moisture<br>content (%) | Seed<br>germination<br>(%) |
|----------------------|--------------------------------|------------------------------|-------------------------------------|----------------------------|
| KS                   | 13°50'11.2"N                   | Brownish black,<br>Ellipsoid | 8.03                                | 45                         |
|                      | 100°05'30.9"E                  |                              |                                     |                            |
| UT                   | 17°45'25.4"N                   |                              | 8.06                                | 40                         |
|                      | 103°06'03.4"E                  |                              |                                     |                            |
| CR                   | 19°35'28.1"N                   |                              | 7.97                                | 40                         |
|                      | 99°42'45.0"E                   |                              |                                     |                            |
| CM                   | 18°43'37.1"N                   |                              | 8.02                                | 42                         |
|                      | 98°54'44.9"E                   |                              |                                     |                            |
| RB                   | 13°41'13.8"N                   |                              | 8.34                                | 30                         |
|                      | 99°44'48.9"E                   |                              |                                     |                            |
